# Supplementary material
Source: Springer Nature journal article supplement (https://www.springermedizin.de/resource/supplementary/13054_2009_7660_MOESM3_ESM.pdf/9730234)

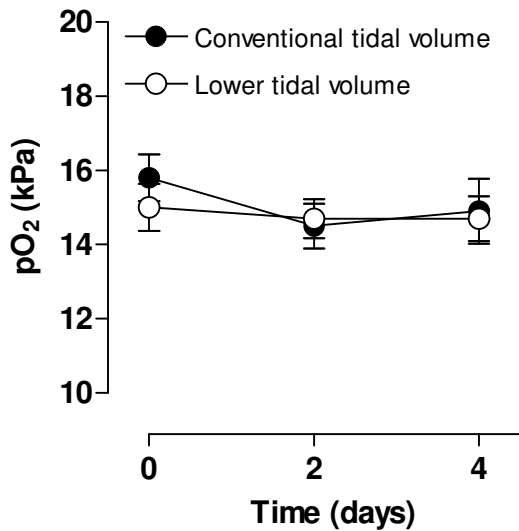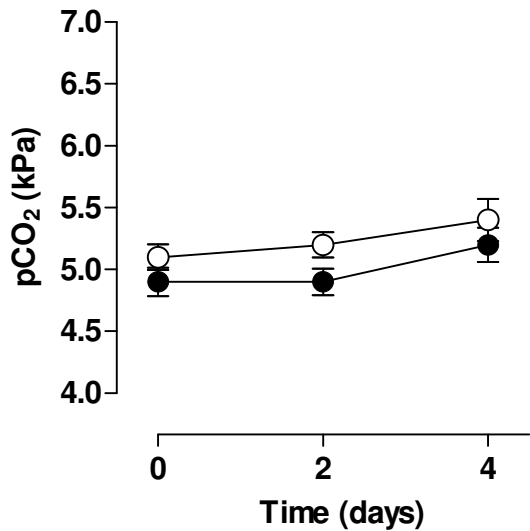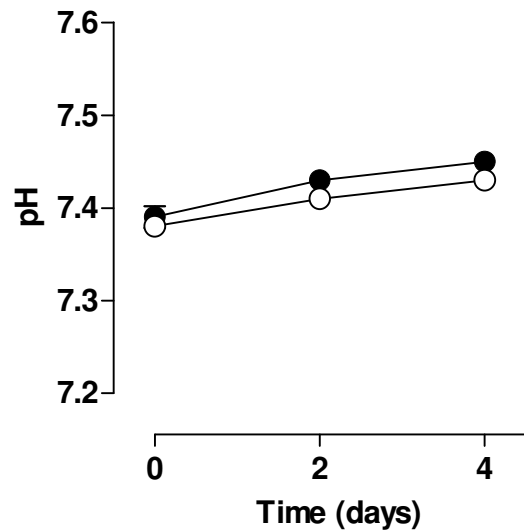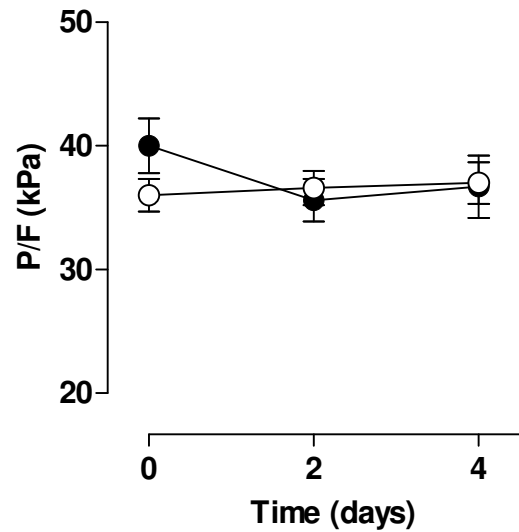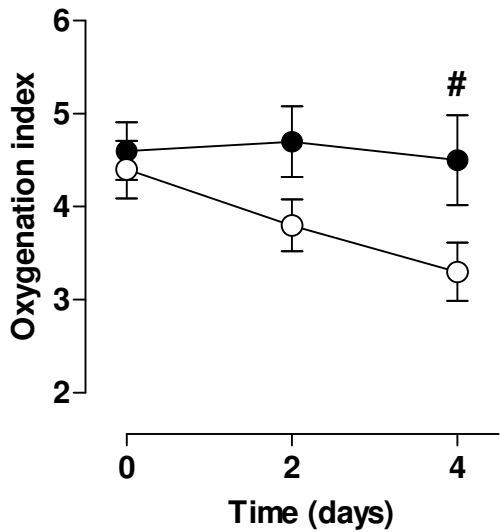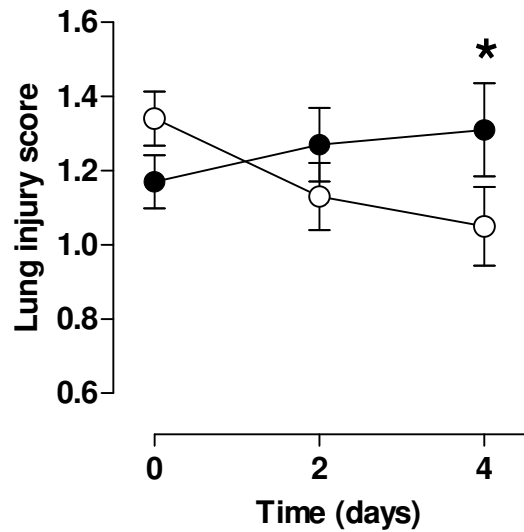

Supplement: MOESM3 [file 9730234]
